# Supplementary material for: Pushing the boundaries of optoacoustic microscopy by total impulse response characterization
Source: Springer Nature journal article supplement (doi:10.1038/s41467-020-16565-2), 2020-06-09
Supplement: MOESM3 [file 41467_2020_16565_MOESM3_ESM.pdf › 41467_2020_16565_MOESM3_ESM.pdf]

## Description of Additional Supplementary Files

Supplementary Movie 1: Comparison between simulation and experiment of TIR characterization

Supplementary Movie 2: Image improvement through TIR correction of a mouse ear vasculature

Supplementary Movie 3: Image improvement through TIR correction of a mouse ear microcapillary

Supplementary Movie 4: Image improvement through TIR correction of a human red blood cell

Supplementary Movie 5: Image improvement through TIR correction of a zebrafish brain vasculature
